# Supplementary material for: Microbial characteristics of dental caries in HIV positive individuals
Source: Frontiers journal article supplement (doi:10.3389/froh.2022.1004930), 2022-09-21

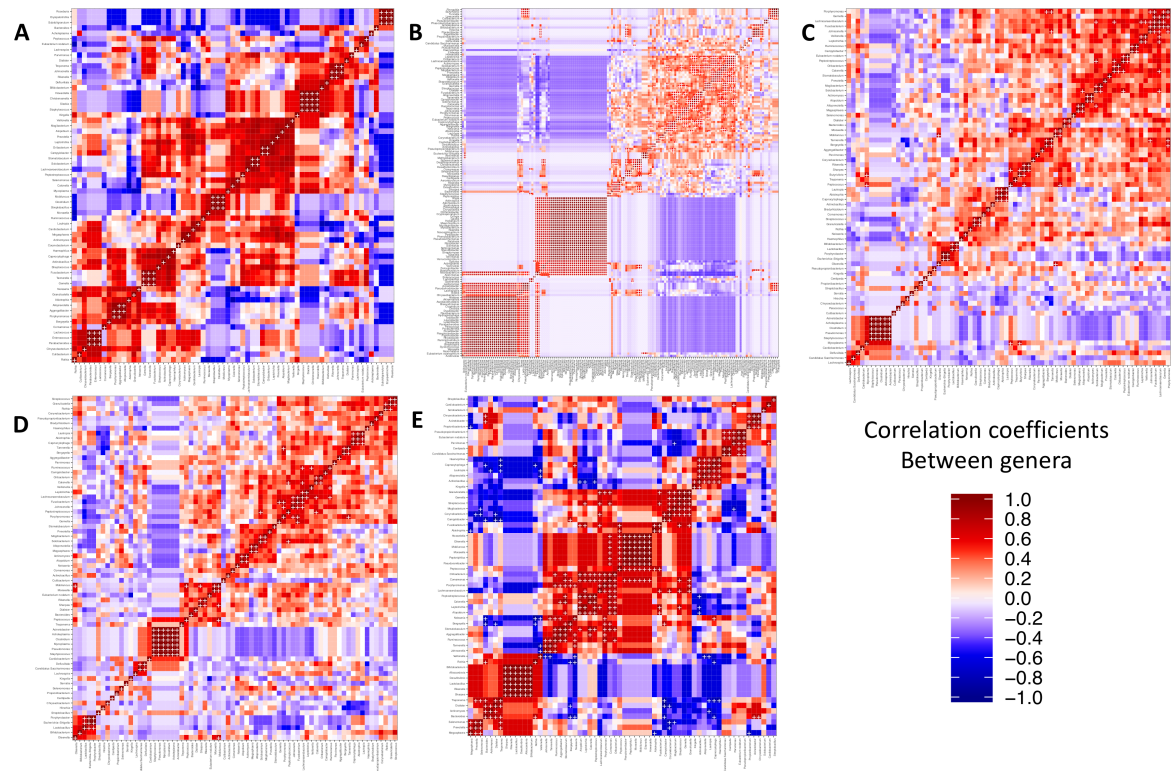

Supplement: Data_Sheet_3.PDF [file Data_Sheet_3.PDF]
