# Supplementary material for: Microbial characteristics of dental caries in HIV positive individuals
Source: Front Oral Health. 2022 Sep 21;3:1004930. doi: 10.3389/froh.2022.1004930 (PMC9533146; doi:10.3389/froh.2022.1004930)
Supplement: Supplementary file 1 [file Table1.xlsx]

## Sheet: DMFT MODEL_ORAL_PATHOGENS
	Healthy	Low	Medium	High
(Intercept)	2.27 **	2.38 ***	2.17 **	2.41 ***
	[0.68, 3.87]	[1.42, 3.33]	[0.87, 3.47]	[1.20, 3.62]
Bacteroidaceae	-2.15	-2.97	-3.5	-1.45
	[-6.50, 2.20]	[-6.75, 0.82]	[-10.12, 3.12]	[-3.94, 1.03]
Campylobacteraceae	0.48	-0.14	-0.43	-0.26
	[-1.37, 2.33]	[-1.38, 1.10]	[-2.23, 1.37]	[-1.87, 1.35]
Clostridiaceae	-4.66	-5.58	-5.52	-3.23
	[-26.04, 16.72]	[-25.94, 14.77]	[-32.32, 21.28]	[-11.27, 4.81]
Defluviitaleaceae	-3.68	-3.51	-3.64	-3.66
	[-11.71, 4.35]	[-7.94, 0.93]	[-10.08, 2.80]	[-9.72, 2.39]
Erysipelotrichaceae	0.53	0.82	1.26	0.57
	[-1.58, 2.65]	[-0.38, 2.02]	[-0.26, 2.77]	[-1.02, 2.17]
Fusobacteriaceae	0.99	0.92	1.31	0.65
	[-0.65, 2.64]	[-0.07, 1.91]	[-0.01, 2.64]	[-0.63, 1.92]
Lachnospiraceae	-0.22	0.02	0.27	-0.35
	[-2.12, 1.67]	[-1.08, 1.12]	[-1.18, 1.72]	[-1.82, 1.12]
Micrococcaceae	0.47	0.52	1.1	1.28
	[-1.60, 2.53]	[-0.70, 1.75]	[-0.41, 2.61]	[-0.09, 2.65]
Mycoplasmataceae	-2.36	-3.13	-3.73	-4.12
	[-12.02, 7.31]	[-11.63, 5.36]	[-19.24, 11.78]	[-21.64, 13.40]
Others	-0.79	-1.01	-1.01	-1.52 *
	[-2.55, 0.98]	[-2.09, 0.08]	[-2.49, 0.47]	[-3.00, -0.03]
Pasteurellaceae	0.05	-0.55	0.41	-0.15
	[-1.83, 1.93]	[-1.82, 0.71]	[-1.05, 1.88]	[-1.62, 1.33]
Peptostreptococcaceae	0.9	0.71	1.16	-0.01
	[-1.07, 2.86]	[-0.51, 1.94]	[-0.37, 2.70]	[-1.86, 1.84]
Porphyromonadaceae	0.58	0.1	0.8	-0.06
	[-1.03, 2.19]	[-0.88, 1.08]	[-0.51, 2.11]	[-1.31, 1.18]
Prevotellaceae	0.27	0.22	0.53	0.19
	[-1.31, 1.86]	[-0.74, 1.17]	[-0.76, 1.82]	[-1.01, 1.40]
Spirochaetaceae	-2.33	-1.78 **	-2.31 *	-2.44 *
	[-4.78, 0.12]	[-3.06, -0.51]	[-4.30, -0.32]	[-4.36, -0.51]
Streptococcaceae	0.4	0.78	1.53 *	0.82
	[-1.28, 2.09]	[-0.21, 1.77]	[0.22, 2.85]	[-0.43, 2.07]
Tannerellaceae	-1.27	-1.1	-0.81	-1.61
	[-4.03, 1.48]	[-2.66, 0.46]	[-2.75, 1.14]	[-3.97, 0.75]
Veillonellaceae	-1.82 *	-1.69 **	-1.76 *	-1.39 *
	[-3.64, -0.01]	[-2.76, -0.61]	[-3.24, -0.29]	[-2.71, -0.07]
Sex	0.35 *	0.05	0.18	0.08
	[0.02, 0.68]	[-0.14, 0.24]	[-0.06, 0.41]	[-0.17, 0.32]
HIV_Status	-0.37 *	0.01	-0.42 **	-0.11
	[-0.67, -0.07]	[-0.18, 0.20]	[-0.69, -0.15]	[-0.36, 0.14]
N	6120	22950	14535	13005
AIC
BIC
Pseudo R2	1	1	1	0.99
All continuous predictors are mean-centered and scaled by 1 standard deviation. *** p < 0.001; ** p < 0.01; * p < 0.05.

## Sheet: DMFT MODEL_CORE_MICROBES
	Healthy	Low	Medium	High	Extremely high	Comment
(Intercept)	2.26 ***	2.65 ***	2.20 ***	2.81 ***	2.95 ***
	[1.31, 3.20]	[2.21, 3.09]	[1.57, 2.83]	[2.18, 3.44]	[2.16, 3.74]
Aerococcaceae	-0.8	-1.19	0.4	-1.05	-2.04
	[-4.94, 3.35]	[-3.49, 1.11]	[-1.18, 1.98]	[-4.16, 2.06]	[-8.34, 4.27]
Atopobiaceae	0.34	-0.1	-0.13	-0.17	-0.05
	[-1.41, 2.10]	[-1.06, 0.86]	[-1.51, 1.26]	[-1.59, 1.25]	[-1.76, 1.65]
Bacteroidaceae	-1.81	-3.07	-3.62	-1.62	-5.03
	[-5.78, 2.17]	[-6.43, 0.30]	[-9.95, 2.71]	[-4.05, 0.80]	[-21.21, 11.14]
Bifidobacteriaceae	-3.29	-2.54 *	-3.29	-2.84	-6.33	Indicator of disease onset
	[-10.69, 4.11]	[-4.91, -0.18]	[-8.15, 1.57]	[-6.79, 1.11]	[-34.32, 21.66]
Burkholderiaceae	1.45 *	0.32	0.69	1.20 *	-0.27
	[0.08, 2.82]	[-0.60, 1.25]	[-0.46, 1.84]	[0.22, 2.18]	[-2.42, 1.88]
Campylobacteraceae	0.83	-0.24	-0.55	-0.43	-1.3
	[-0.49, 2.14]	[-1.09, 0.61]	[-1.92, 0.82]	[-1.74, 0.89]	[-3.70, 1.09]
Cardiobacteriaceae	-2.64	-2.67	-2.39	-2.3	-3.35
	[-10.57, 5.29]	[-6.35, 1.02]	[-6.98, 2.21]	[-6.77, 2.16]	[-12.71, 6.01]
Carnobacteriaceae	1.25	1.26 ***	2.19 ***	1.02 *	1.13	Indicator of disease onset
	[-0.13, 2.63]	[0.63, 1.89]	[1.46, 2.93]	[0.04, 2.00]	[-0.06, 2.32]
Corynebacteriaceae	-2.47	-2.80 **	-2.44	-2.2	-3.77	Indicator of disease onset
	[-6.30, 1.35]	[-4.86, -0.75]	[-4.92, 0.03]	[-4.43, 0.04]	[-9.71, 2.18]
Erysipelotrichaceae	0.88	0.72	1.13 *	0.4	1.28 *	First stage of Progression
	[-0.76, 2.51]	[-0.08, 1.52]	[0.14, 2.12]	[-0.89, 1.70]	[0.08, 2.48]
Flavobacteriaceae	-1.27	-2.47 ***	-1.73 **	-2.23 ***	-2.07 **	indicator of disease onset
	[-2.69, 0.16]	[-3.47, -1.46]	[-2.82, -0.64]	[-3.55, -0.91]	[-3.63, -0.51]
Fusobacteriaceae	1.34 *	0.82 **	1.19 ***	0.48	0.2
	[0.30, 2.37]	[0.31, 1.33]	[0.50, 1.88]	[-0.30, 1.26]	[-0.84, 1.23]
Lachnospiraceae	-0.71	-1.13 ***	-0.69	-1.47 ***	-1.34 *	Indicator of disease onset
	[-1.80, 0.39]	[-1.67, -0.59]	[-1.41, 0.02]	[-2.31, -0.64]	[-2.35, -0.32]
Leptotrichiaceae	-0.78	-1.37 ***	-0.54	-1.42 **	-1.48 *	Indicator of disease onset
	[-2.00, 0.45]	[-2.02, -0.72]	[-1.30, 0.23]	[-2.38, -0.46]	[-2.70, -0.26]
Micrococcaceae	0.81	0.42	0.97	1.11 *	-0.26	Second stage of progression
	[-0.77, 2.39]	[-0.41, 1.25]	[-0.01, 1.96]	[0.16, 2.07]	[-2.23, 1.72]
Moraxellaceae	-1.05	-2.47	-0.92	-4.29	-2.01
	[-5.73, 3.63]	[-6.79, 1.84]	[-3.80, 1.97]	[-19.68, 11.11]	[-8.24, 4.22]
Neisseriaceae	1.65 ***	0.82 ***	1.52 ***	1.36 ***	0.17
	[0.68, 2.63]	[0.34, 1.30]	[0.87, 2.16]	[0.70, 2.02]	[-0.78, 1.13]
Others	-0.09	-0.53	-0.06	-0.85 *	-0.48
	[-1.18, 1.00]	[-1.07, 0.01]	[-0.78, 0.65]	[-1.69, -0.02]	[-1.45, 0.49]
Pasteurellaceae	1.45 **	1.02 ***	1.22 ***	1.04 **	-0.15
	[0.47, 2.43]	[0.56, 1.49]	[0.57, 1.88]	[0.36, 1.71]	[-1.15, 0.85]
Peptococcaceae	-2.46	-2.46	-2.76	-2.87	-2.68
	[-9.71, 4.79]	[-5.78, 0.87]	[-8.27, 2.75]	[-8.76, 3.02]	[-9.41, 4.05]
Peptostreptococcaceae	1.24	0.61	1.04 *	-0.18	0.46
	[-0.21, 2.70]	[-0.22, 1.44]	[0.01, 2.06]	[-1.82, 1.47]	[-1.13, 2.05]
Porphyromonadaceae	0.92	0	0.67 *	-0.23	-0.86
	[-0.06, 1.90]	[-0.49, 0.49]	[0.02, 1.33]	[-0.97, 0.50]	[-1.89, 0.17]
Prevotellaceae	0.59	0.08	0.35	0	0.19
	[-0.34, 1.53]	[-0.36, 0.51]	[-0.27, 0.97]	[-0.64, 0.63]	[-0.60, 0.98]
Ruminococcaceae	0.07	-0.89 *	0.23	-1.24	-1.81	indicator of disease onset
	[-1.28, 1.42]	[-1.73, -0.04]	[-0.63, 1.08]	[-2.64, 0.17]	[-4.06, 0.44]
Spirochaetaceae	-1.99	-1.88 ***	-2.44 **	-2.61 **	-2.94 *	indicator of disease onset
	[-4.00, 0.03]	[-2.77, -0.99]	[-4.03, -0.84]	[-4.35, -0.87]	[-5.47, -0.41]
Streptococcaceae	0.75	0.68 **	1.41 ***	0.65	0.73
	[-0.34, 1.84]	[0.17, 1.19]	[0.74, 2.07]	[-0.08, 1.39]	[-0.18, 1.64]
Tannerellaceae	-0.93	-1.2	-0.93	-1.78	-1.57
	[-3.28, 1.42]	[-2.41, 0.01]	[-2.48, 0.61]	[-4.06, 0.50]	[-4.17, 1.02]
Veillonellaceae	-0.28	-0.74 **	-0.67	-0.74 *	-0.94 *	indicator of disease onset
	[-1.29, 0.73]	[-1.23, -0.26]	[-1.36, 0.02]	[-1.44, -0.04]	[-1.84, -0.04]
Weeksellaceae	-0.79	-0.98 *	-1.13	-1.21	-1.41
	[-2.75, 1.18]	[-1.96, -0.00]	[-2.62, 0.36]	[-2.77, 0.35]	[-3.54, 0.71]
Sex	-0.04	0.02	0.08	-0.15	-0.04
	[-0.27, 0.19]	[-0.11, 0.15]	[-0.09, 0.26]	[-0.35, 0.05]	[-0.42, 0.33]
HIV_Status	-0.63 ***	-0.14 *	-0.22 *	-0.66 ***	-0.23
	[-0.85, -0.42]	[-0.28, -0.01]	[-0.43, -0.02]	[-0.98, -0.33]	[-0.55, 0.09]
BPE2	0.18	-0.15 *	-0.08	0.44 **	0.06
	[-0.04, 0.40]	[-0.28, -0.02]	[-0.24, 0.07]	[0.11, 0.77]	[-0.49, 0.61]
N	10544	39540	25042	22406	7908
AIC
BIC
Pseudo R2	1	1	1	1	1
All continuous predictors are mean-centered and scaled by 1 standard deviation. *** p < 0.001; ** p < 0.01; * p < 0.05.

## Sheet: PERIODONTAL DISEASE MODEL
	Gingivitis model	Periodotitis model
(Intercept)	2.59 ***	2.47 ***
	[2.24, 2.95]	[2.00, 2.94]
Aerococcaceae	-0.55	-0.97
	[-1.94, 0.84]	[-3.17, 1.23]
Atopobiaceae	-0.23	0.1
	[-1.05, 0.60]	[-0.84, 1.04]
Bacteroidaceae	-3.91	-1.75
	[-8.09, 0.27]	[-3.65, 0.14]
Bifidobacteriaceae	-3.81 *	-2.27 *
	[-7.41, -0.21]	[-4.48, -0.07]
Burkholderiaceae	0.88 **	0.46
	[0.26, 1.50]	[-0.48, 1.39]
Campylobacteraceae	-0.27	-0.3
	[-0.97, 0.43]	[-1.22, 0.62]
Cardiobacteriaceae	-2.54	-2.61
	[-5.37, 0.30]	[-6.44, 1.21]
Carnobacteriaceae	1.55 ***	1.22 ***
	[1.06, 2.03]	[0.54, 1.90]
Corynebacteriaceae	-2.40 ***	-2.95 *
	[-3.80, -1.01]	[-5.31, -0.60]
Erysipelotrichaceae	0.82 *	0.83 *
	[0.19, 1.45]	[0.02, 1.65]
Flavobacteriaceae	-2.01 ***	-2.24 ***
	[-2.70, -1.32]	[-3.21, -1.26]
Fusobacteriaceae	0.77 ***	0.86 **
	[0.35, 1.19]	[0.32, 1.40]
Lachnospiraceae	-1.20 ***	-0.98 ***
	[-1.65, -0.75]	[-1.54, -0.42]
Leptotrichiaceae	-1.17 ***	-1.14 ***
	[-1.68, -0.67]	[-1.79, -0.49]
Micrococcaceae	0.72 *	0.7
	[0.11, 1.33]	[-0.11, 1.50]
Moraxellaceae	-1.83	-2.2
	[-4.41, 0.75]	[-6.20, 1.81]
Neisseriaceae	1.19 ***	1.04 ***
	[0.81, 1.57]	[0.54, 1.54]
Others	-0.43	-0.51
	[-0.87, 0.00]	[-1.09, 0.06]
Pasteurellaceae	1.19 ***	0.70 **
	[0.81, 1.57]	[0.18, 1.21]
Peptococcaceae	-2.76	-2.44
	[-5.94, 0.41]	[-5.94, 1.07]
Peptostreptococcaceae	0.52	0.71
	[-0.19, 1.22]	[-0.14, 1.56]
Porphyromonadaceae	0.24	-0.06
	[-0.16, 0.63]	[-0.58, 0.47]
Prevotellaceae	0.12	0.21
	[-0.23, 0.48]	[-0.25, 0.67]
Ruminococcaceae	-1.02 **	-0.26
	[-1.75, -0.29]	[-0.99, 0.46]
Spirochaetaceae	-3.02 ***	-1.62 ***
	[-4.21, -1.84]	[-2.48, -0.76]
Streptococcaceae	0.95 ***	0.67 *
	[0.55, 1.35]	[0.13, 1.21]
Tannerellaceae	-1.30 *	-1.25
	[-2.34, -0.26]	[-2.57, 0.07]
Veillonellaceae	-0.82 ***	-0.58 *
	[-1.22, -0.42]	[-1.09, -0.08]
Weeksellaceae	-0.91 *	-1.40 *
	[-1.69, -0.13]	[-2.64, -0.16]
Sex	-0.03	0.08
	[-0.14, 0.07]	[-0.05, 0.21]
HIV_Status	-0.28 ***	-0.19 **
	[-0.38, -0.18]	[-0.33, -0.05]
N	60628	44812
AIC
BIC
Pseudo R2	1	0.99
All continuous predictors are mean-centered and scaled by 1 standard deviation. *** p < 0.001; ** p < 0.01; * p < 0.05.
